# Supplementary material for: Cencurut virus: A novel Orthonairovirus from Asian house shrews (Suncus murinus) in Singapore
Source: PubMed Central journal article supplement (PMC10288052; doi:10.1016/j.onehlt.2023.100529), 2023-03-29
Supplement: mmc4.pdf [file mmc4.pdf]

a)

|          | 290     |
|----------|---------|
| 1. SM-15 | T V L D |
| 2. SM-29 | T V L D |
| 3. SM-37 | T V L D |
| 4. TFAV  | D I L D |
| 5. ERVEV | D V L D |
| 6. LMSV  | S I M D |
| 7. LMGV  | N I L E |

b)

| Gn  |   |   |   |   |   |   |   |
|-----|---|---|---|---|---|---|---|
| 310 |   |   |   |   |   |   |   |
| R   | K | L | M | S | L | S | T |
| R   | K | L | M | S | L | S | T |
| R   | K | L | M | S | L | S | T |
| R   | K | L | L | T | A | A | D |
| R   | R | L | L | S | T | G | D |
| R   | K | L | L | S | I | N | E |
| R   | K | L | L | S | I | N | E |

c)

| Gc  |   |   |   |   |   |   |   |
|-----|---|---|---|---|---|---|---|
| 680 |   |   |   |   |   |   |   |
| R   | K | L | M | F | F | H | I |
| R   | K | L | M | F | F | H | I |
| R   | K | L | M | F | F | H | I |
| R   | K | L | L | F | F | H | L |
| R   | Q | L | L | F | Y | H | L |
| R   | K | L | L | F | Y | H | L |
| R   | K | L | L | F | Y | H | L |
