# Supplementary material for: Cencurut virus: A novel Orthonairovirus from Asian house shrews (Suncus murinus) in Singapore
Source: PubMed Central journal article supplement (PMC10288052; doi:10.1016/j.onehlt.2023.100529), 2023-03-29
Supplement: mmc6.pdf [file mmc6.pdf]

a) Sample ID

| SM-07*                    | SM-09* | SM-10 | SM-13 | SM-14 | SM-15 | SM-16 | SM-17 | SM-18 | SM-19 | SM-20 | SM-21 | SM-22 | SM-23 | SM-24 | SM-25 | SM-26 | SM-27 | SM-28 | SM-29 | SM-30 | SM-31 | SM-32 | SM-33 | SM-35 | SM-36 | SM-37 | Tick |      |
|---------------------------|--------|-------|-------|-------|-------|-------|-------|-------|-------|-------|-------|-------|-------|-------|-------|-------|-------|-------|-------|-------|-------|-------|-------|-------|-------|-------|------|------|
| Nucleotide similarity (%) |        |       |       |       |       |       |       |       |       |       |       |       |       |       |       |       |       |       |       |       |       |       |       |       |       |       |      |      |
| SM-07*                    | 92.7   | 95.7  | 95.0  | 94.0  | 93.8  | 93.9  | 93.9  | 94.6  | 94.2  | 94.5  | 94.5  | 94.0  | 94.6  | 94.6  | 94.3  | 94.6  | 94.1  | 94.5  | 94.3  | 95.1  | 93.9  | 94.9  | 94.5  | 93.7  | 93.6  | 94.2  | 93.5 |      |
| SM-09*                    | 93.4   | 93.9  | 93.0  | 93.3  | 93.5  | 93.2  | 93.2  | 94.0  | 95.3  | 94.3  | 93.9  | 93.9  | 94.1  | 93.6  | 93.5  | 93.5  | 93.6  | 93.9  | 93.8  | 93.4  | 94.7  | 95.5  | 93.1  | 93.3  | 93.5  | 93.3  |      |      |
| SM-10                     | 96.1   | 95.0  | 97.8  | 96.5  | 96.4  | 95.6  | 95.6  | 96.3  | 96.3  | 96.6  | 96.3  | 96.0  | 96.3  | 96.4  | 96.2  | 96.7  | 96.3  | 96.0  | 96.1  | 96.9  | 95.7  | 96.1  | 95.9  | 95.4  | 95.4  | 95.8  | 95.3 |      |
| SM-13                     | 96.2   | 94.3  | 98.6  | 96.5  | 96.4  | 95.3  | 95.3  | 96.0  | 96.1  | 96.6  | 95.8  | 95.7  | 96.0  | 96.0  | 95.7  | 95.9  | 95.5  | 95.8  | 95.7  | 95.5  | 95.5  | 95.6  | 95.5  | 95.2  | 95.2  | 95.4  | 95.1 |      |
| SM-14                     | 95.8   | 94.7  | 98.1  | 98.2  | 98.3  | 95.4  | 95.4  | 96.1  | 96.1  | 96.4  | 95.9  | 95.8  | 96.0  | 96.1  | 95.7  | 96.0  | 95.6  | 96.0  | 95.7  | 95.6  | 95.5  | 95.9  | 95.6  | 95.0  | 95.1  | 95.5  | 95.1 |      |
| SM-15                     | 95.8   | 94.6  | 98.1  | 98.3  | 99.2  | 95.4  | 95.4  | 95.9  | 96.7  | 96.9  | 95.8  | 95.7  | 95.9  | 95.9  | 95.6  | 95.8  | 95.5  | 95.9  | 95.6  | 95.5  | 95.4  | 95.6  | 95.4  | 95.0  | 95.0  | 95.3  | 95.6 |      |
| SM-16                     | 96.2   | 94.7  | 97.9  | 98.0  | 98.1  | 98.3  | 100.0 | 97.8  | 97.0  | 97.0  | 95.7  | 95.5  | 95.8  | 96.0  | 95.7  | 95.7  | 95.5  | 95.6  | 95.5  | 95.8  | 95.5  | 95.5  | 95.3  | 95.0  | 95.1  | 95.4  | 95.4 |      |
| SM-17                     | 96.2   | 94.7  | 97.9  | 98.0  | 98.1  | 98.3  | 100.0 | 97.8  | 97.0  | 97.0  | 95.7  | 95.5  | 95.8  | 96.0  | 95.7  | 95.7  | 95.5  | 95.6  | 95.5  | 95.8  | 95.5  | 95.5  | 95.3  | 95.0  | 95.1  | 95.4  | 95.4 |      |
| SM-18                     | 96.3   | 95.0  | 98.3  | 98.2  | 98.4  | 98.4  | 98.9  | 98.9  | 97.3  | 97.2  | 96.6  | 96.4  | 97.9  | 97.3  | 96.4  | 96.4  | 96.4  | 96.7  | 96.4  | 96.4  | 96.8  | 96.9  | 96.8  | 95.7  | 95.9  | 97.0  | 95.6 |      |
| SM-19                     | 95.9   | 95.5  | 98.2  | 98.2  | 98.3  | 98.5  | 98.9  | 98.9  | 98.9  | 97.9  | 97.3  | 96.5  | 96.9  | 97.0  | 96.6  | 96.4  | 96.5  | 96.5  | 96.4  | 96.2  | 96.2  | 96.8  | 96.7  | 95.8  | 95.8  | 96.2  | 96.5 |      |
| SM-20                     | 96.3   | 95.1  | 98.2  | 98.2  | 98.3  | 98.5  | 98.9  | 98.9  | 98.8  | 99.1  | 96.7  | 96.8  | 97.1  | 97.1  | 96.6  | 96.6  | 96.5  | 96.6  | 96.5  | 96.4  | 96.4  | 96.6  | 96.4  | 95.9  | 95.9  | 96.3  | 97.7 |      |
| SM-21                     | 96.3   | 94.9  | 98.0  | 97.9  | 98.1  | 98.2  | 98.3  | 98.3  | 98.9  | 98.9  | 98.4  | 96.4  | 96.8  | 96.9  | 96.3  | 96.5  | 96.3  | 96.2  | 96.1  | 96.0  | 96.5  | 96.2  | 95.4  | 95.5  | 95.9  | 95.4  |      |      |
| SM-22                     | 96.1   | 94.8  | 98.1  | 97.9  | 98.1  | 98.1  | 98.1  | 98.7  | 98.5  | 98.6  | 98.4  | 98.5  | 96.6  | 96.4  | 96.1  | 96.3  | 96.2  | 96.0  | 95.8  | 95.9  | 96.2  | 96.1  | 95.3  | 95.6  | 95.9  | 95.3  |      |      |
| SM-23                     | 96.2   | 94.8  | 98.0  | 97.9  | 98.1  | 98.1  | 98.3  | 98.3  | 99.3  | 98.7  | 98.7  | 98.6  | 99.4  | 97.5  | 96.7  | 96.3  | 96.6  | 96.6  | 96.3  | 96.1  | 96.7  | 97.0  | 97.0  | 95.7  | 95.9  | 96.9  | 95.5 |      |
| SM-24                     | 96.4   | 95.0  | 98.1  | 98.0  | 98.2  | 98.3  | 98.5  | 98.5  | 99.1  | 98.8  | 98.7  | 98.8  | 98.7  | 99.1  | 96.7  | 96.3  | 96.6  | 96.5  | 96.3  | 96.2  | 96.4  | 96.9  | 96.8  | 95.6  | 95.8  | 96.6  | 95.7 |      |
| SM-25                     | 96.3   | 94.9  | 98.0  | 97.9  | 98.2  | 98.2  | 98.3  | 98.3  | 98.7  | 98.7  | 98.5  | 98.6  | 98.7  | 98.7  | 98.7  | 96.3  | 96.5  | 96.1  | 96.0  | 96.0  | 95.8  | 96.3  | 96.0  | 95.4  | 95.5  | 95.8  | 95.3 |      |
| SM-26                     | 96.2   | 94.7  | 98.2  | 98.0  | 98.2  | 98.2  | 98.4  | 98.4  | 98.7  | 98.4  | 98.4  | 98.3  | 98.4  | 98.5  | 98.5  | 98.4  | 98.9  | 97.2  | 96.2  | 96.0  | 96.4  | 95.9  | 96.0  | 95.7  | 95.5  | 95.5  | 95.8 | 95.4 |
| SM-27                     | 96.1   | 94.8  | 98.1  | 97.8  | 98.1  | 98.1  | 98.2  | 98.2  | 98.9  | 98.5  | 98.5  | 98.5  | 98.6  | 98.7  | 98.8  | 98.6  | 98.9  | 95.9  | 95.9  | 96.3  | 95.7  | 96.2  | 95.9  | 95.3  | 95.3  | 95.6  | 95.2 |      |
| SM-28                     | 96.3   | 94.6  | 97.9  | 97.9  | 98.2  | 98.2  | 98.1  | 98.1  | 98.6  | 98.5  | 98.4  | 98.3  | 98.4  | 98.4  | 98.4  | 98.3  | 98.4  | 98.3  | 96.0  | 95.7  | 96.0  | 96.2  | 96.0  | 95.4  | 95.7  | 96.1  | 95.4 |      |
| SM-29                     | 96.1   | 95.1  | 98.0  | 97.9  | 98.1  | 98.1  | 98.1  | 98.6  | 98.4  | 98.4  | 98.3  | 98.4  | 98.5  | 98.4  | 98.4  | 98.4  | 98.4  | 98.2  | 95.9  | 95.9  | 96.0  | 95.9  | 95.5  | 95.5  | 95.9  | 95.4  |      |      |
| SM-30                     | 96.4   | 94.9  | 98.4  | 97.8  | 98.0  | 98.1  | 98.3  | 98.3  | 98.6  | 98.5  | 98.4  | 98.3  | 98.3  | 98.3  | 98.4  | 98.4  | 98.5  | 98.5  | 98.2  | 98.2  | 95.7  | 95.9  | 95.6  | 95.3  | 95.2  | 95.7  | 95.3 |      |
| SM-31                     | 95.8   | 94.3  | 97.7  | 97.7  | 97.8  | 97.9  | 98.0  | 98.0  | 98.8  | 98.4  | 98.3  | 98.1  | 98.2  | 98.5  | 98.3  | 98.0  | 98.2  | 98.2  | 98.1  | 98.1  | 98.1  | 96.2  | 96.5  | 95.2  | 95.5  | 96.2  | 95.3 |      |
| SM-32                     | 96.4   | 95.1  | 97.9  | 97.8  | 98.1  | 98.1  | 98.3  | 98.3  | 99.0  | 98.7  | 98.5  | 98.5  | 98.5  | 98.9  | 98.8  | 98.5  | 98.3  | 98.5  | 98.3  | 98.3  | 98.2  | 98.4  | 98.1  | 95.4  | 95.6  | 96.2  | 95.3 |      |
| SM-33                     | 96.4   | 95.1  | 97.9  | 97.9  | 98.0  | 98.1  | 98.2  | 98.2  | 99.0  | 98.7  | 98.5  | 98.5  | 98.5  | 98.9  | 98.7  | 98.5  | 98.3  | 98.5  | 98.3  | 98.2  | 98.3  | 98.6  | 99.4  | 95.2  | 95.4  | 96.1  | 95.1 |      |
| SM-35                     | 96.1   | 94.6  | 97.6  | 97.7  | 97.6  | 97.7  | 97.9  | 97.9  | 98.3  | 98.1  | 98.1  | 97.8  | 97.9  | 98.0  | 98.0  | 97.9  | 97.9  | 98.0  | 98.0  | 97.8  | 97.7  | 98.0  | 98.0  | 98.3  | 96.5  | 96.0  |      |      |
| SM-36                     | 96.1   | 94.5  | 97.5  | 97.5  | 97.6  | 97.6  | 97.8  | 97.8  | 98.3  | 98.0  | 98.0  | 97.8  | 97.9  | 98.0  | 98.0  | 97.8  | 97.9  | 97.9  | 98.0  | 97.7  | 97.7  | 98.0  | 98.0  | 99.3  | 96.6  | 95.9  |      |      |
| SM-37                     | 96.3   | 94.5  | 97.7  | 97.7  | 97.9  | 97.9  | 98.1  | 98.1  | 98.8  | 98.3  | 98.2  | 98.1  | 98.2  | 98.5  | 98.4  | 98.2  | 98.2  | 98.2  | 98.2  | 98.2  | 98.0  | 98.2  | 98.5  | 98.5  | 98.3  | 98.3  | 98.6 |      |
| Tick                      | 95.9   | 94.5  | 97.6  | 97.6  | 97.8  | 98.0  | 98.1  | 98.1  | 98.3  | 98.5  | 98.8  | 97.9  | 98.0  | 98.1  | 98.0  | 98.0  | 98.0  | 98.0  | 97.9  | 97.9  | 97.8  | 98.0  | 98.0  | 98.1  | 98.0  | 99.4  | 98.6 |      |
| Amino acid similarity (%) |        |       |       |       |       |       |       |       |       |       |       |       |       |       |       |       |       |       |       |       |       |       |       |       |       |       |      |      |

\* partial genomes

b) Sample ID

| SM-07*                 | SM-09* | SM-10 | SM-13 | SM-14 | SM-15 | SM-16 | SM-17 | SM-18 | SM-19 | SM-20 | SM-21 | SM-22 | SM-23 | SM-24 | SM-25 | SM-26 | SM-27 | SM-28 | SM-29 | SM-30 | SM-31 | SM-32 | SM-33 | SM-35 | SM-36 | SM-37 | Tick |
|------------------------|--------|-------|-------|-------|-------|-------|-------|-------|-------|-------|-------|-------|-------|-------|-------|-------|-------|-------|-------|-------|-------|-------|-------|-------|-------|-------|------|
| Nucleotide differences |        |       |       |       |       |       |       |       |       |       |       |       |       |       |       |       |       |       |       |       |       |       |       |       |       |       |      |
| SM-07*                 | 345    | 289   | 331   | 398   | 412   | 405   | 405   | 360   | 385   | 365   | 365   | 397   | 362   | 361   | 378   | 361   | 390   | 366   | 377   | 326   | 402   | 339   | 365   | 415   | 427   | 386   | 432  |
| SM-09*                 | 98     | 627   | 715   | 695   | 667   | 695   | 695   | 627   | 492   | 588   | 632   | 632   | 633   | 607   | 661   | 675   | 670   | 664   | 628   | 644   | 679   | 552   | 471   | 713   | 691   | 666   | 685  |
| SM-10                  | 83     | 163   | 384   | 602   | 617   | 763   | 763   | 647   | 637   | 586   | 642   | 684   | 646   | 630   | 659   | 580   | 633   | 686   | 666   | 530   | 733   | 673   | 708   | 789   | 793   | 731   | 806  |
| SM-13                  | 82     | 191   | 79    | 596   | 611   | 791   | 791   | 691   | 669   | 590   | 720   | 731   | 687   | 678   | 731   | 694   | 760   | 708   | 733   | 769   | 763   | 746   | 767   | 823   | 815   | 776   | 831  |
| SM-14                  | 90     | 176   | 107   | 101   | 286   | 785   | 785   | 681   | 666   | 617   | 696   | 716   | 681   | 669   | 725   | 691   | 742   | 689   | 731   | 753   | 764   | 707   | 751   | 846   | 835   | 770   | 839  |
| SM-15                  | 90     | 180   | 105   | 97    | 48    | 776   | 776   | 705   | 571   | 533   | 717   | 734   | 705   | 698   | 749   | 715   | 766   | 705   | 753   | 771   | 788   | 742   | 777   | 850   | 849   | 793   | 755  |
| SM-16                  | 83     | 176   | 116   | 113   | 107   | 95    | 0     | 387   | 513   | 513   | 736   | 771   | 711   | 687   | 737   | 728   | 761   | 756   | 771   | 717   | 772   | 759   | 798   | 851   | 842   | 775   | 777  |
| SM-17                  | 83     | 176   | 116   | 113   | 107   | 95    | 0     | 387   | 513   | 513   | 736   | 771   | 711   | 687   | 737   | 728   | 761   | 756   | 771   | 717   | 772   | 759   | 798   | 851   | 842   | 775   | 777  |
| SM-18                  | 80     | 166   | 97    | 101   | 89    | 89    | 65    | 65    | 473   | 494   | 595   | 619   | 370   | 475   | 615   | 630   | 614   | 578   | 628   | 625   | 555   | 538   | 560   | 735   | 703   | 526   | 751  |
| SM-19                  | 89     | 152   | 102   | 104   | 97    | 84    | 63    | 63    | 60    | 360   | 461   | 594   | 539   | 521   | 584   | 622   | 606   | 603   | 626   | 658   | 644   | 554   | 571   | 724   | 715   | 648   | 599  |
| SM-20                  | 80     | 165   | 100   | 102   | 98    | 83    | 64    | 64    | 66    | 53    | 561   | 544   | 501   | 506   | 583   | 582   | 594   | 582   | 601   | 614   | 609   | 591   | 624   | 697   | 703   | 633   | 400  |
| SM-21                  | 80     | 171   | 114   | 120   | 108   | 103   | 95    | 95    | 65    | 65    | 88    | 616   | 555   | 523   | 533   | 630   | 585   | 635   | 650   | 663   | 678   | 593   | 645   | 783   | 775   | 695   | 784  |
| SM-22                  | 85     | 172   | 108   | 120   | 107   | 108   | 105   | 105   | 72    | 85    | 81    | 88    | 255   | 576   | 616   | 664   | 632   | 649   | 678   | 706   | 693   | 641   | 663   | 792   | 755   | 705   | 793  |
| SM-23                  | 82     | 174   | 112   | 117   | 105   | 105   | 95    | 95    | 37    | 76    | 74    | 77    | 35    | 430   | 568   | 629   | 587   | 589   | 625   | 663   | 564   | 508   | 510   | 742   | 711   |       |      |
